# Supplementary material for: High performance platinum-free counter electrode of molybdenum sulfide–carbon used in dye-sensitized solar cells
Source: Royal Society of Chemistry journal article supplement (doi:10.1039/c2ta00860b), 2012-11-19
Supplement: c2ta00860b.pdf [file c2ta00860b.pdf]

## Electronic Supplementary Information

for *J. Mater. Chem. A*, DOI: 10.1039/c0xx00000x

High performance platinum-free counter electrode of molybdenum  
sulfide/carbon used in dye-sensitized solar cells †

Gentian Yue, Jihuai Wu, Yaoming Xiao, Miaoliang Huang, Jianming Lin, Jeng-Yu Lin

Figure S1-S4, Table S1

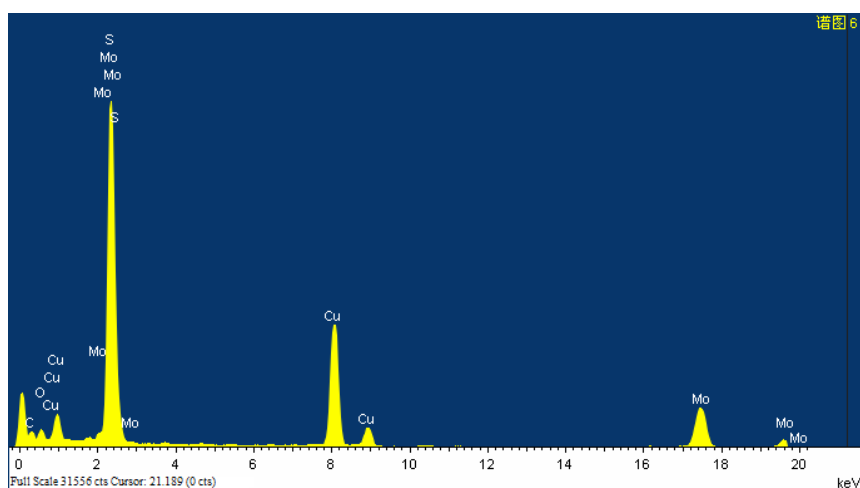

**Fig. S1** EDS spectrum of the MoS<sub>2</sub>/C sample.

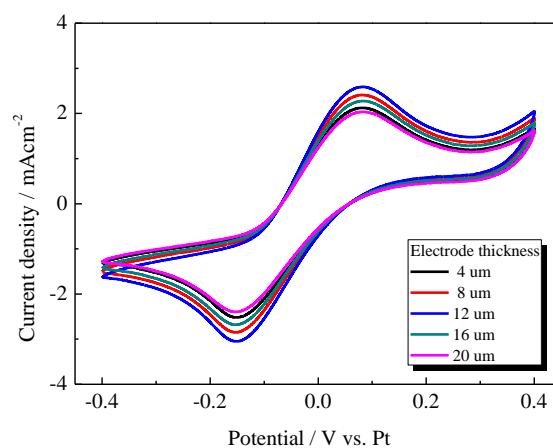

**Fig. S2** CVs for MoS<sub>2</sub>/C electrodes with different thicknesses, measuring at scan rate of 10 mV·s<sup>-1</sup>.

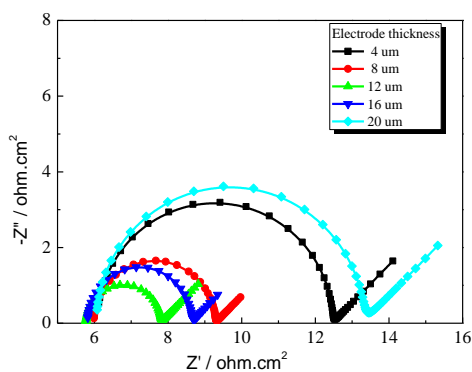

**Fig. S3** Nyquist plots of the dummy cells based on two identical MoS<sub>2</sub>/C electrodes with different thicknesses.

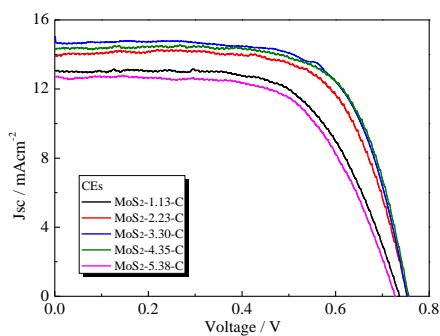

**Fig. S4** *J-V* curves of the DSSCs based on the MoS<sub>2</sub>/C CEs with different carbon contents.

**Table S1** The photoelectric properties of the DSSCs based on the MoS<sub>2</sub>/C CE with various thicknesses. (*V<sub>oc</sub>*: open circuit voltage; *FF*: fill factor; *J<sub>sc</sub>*: short-circuit current density)

| CE thickness | <i>V<sub>oc</sub></i> (V) | <i>J<sub>sc</sub></i> (mA·cm <sup>-2</sup> ) | <i>FF</i> | <i>η</i> (%) |
|--------------|---------------------------|----------------------------------------------|-----------|--------------|
| 4 μm         | 0.68                      | 12.29                                        | 0.61      | 5.10         |
| 8 μm         | 0.73                      | 14.53                                        | 0.65      | 6.89         |
| 12 μm        | 0.75                      | 15.07                                        | 0.68      | 7.69         |
| 16 μm        | 0.74                      | 14.35                                        | 0.66      | 7.01         |
| 20 μm        | 0.67                      | 12.48                                        | 0.58      | 4.85         |
